# Supplementary material for: Appearance and Propagation of Polyglutamine-based Amyloids in Yeast: TYROSINE RESIDUES ENABLE POLYMER FRAGMENTATION
Source: PubMed Central journal article supplement — J Biol Chem. 2008 May 30;283(22):15185–92. doi: 10.1074/jbc.M802071200 (PMC2397454; doi:10.1074/jbc.m802071200), 2008-05-30
Supplement: M802071200_1.pdf [file M802071200_1.pdf]

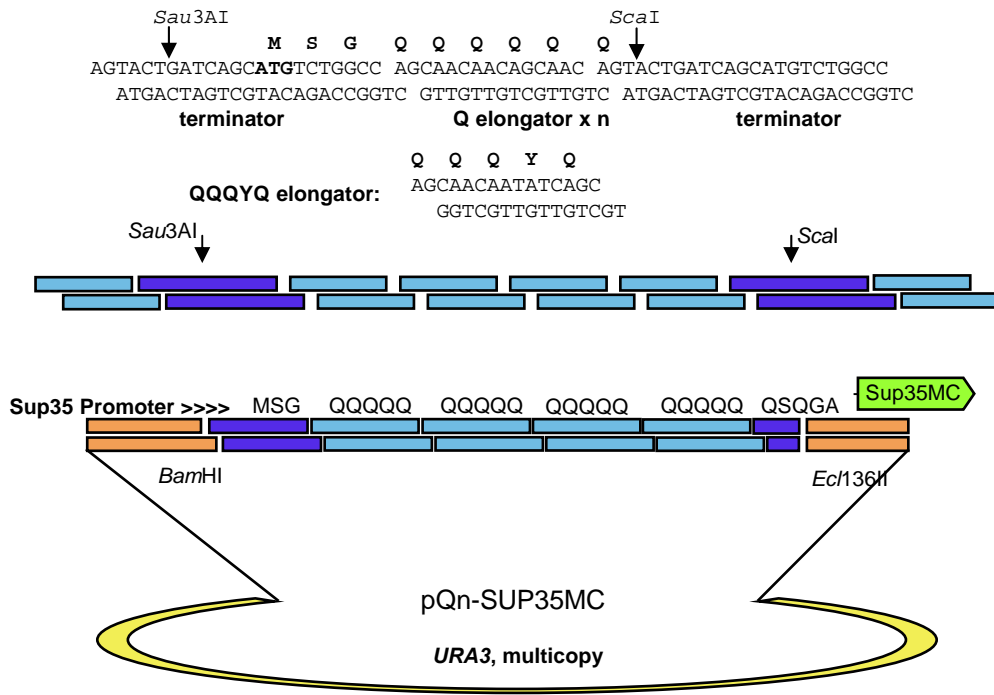

**Supplementary Figure 1. Construction of plasmid series encoding polyQ/QY-Sup35MC fusion proteins.** The plasmid series were based on pSBSE plasmid (see Materials and Methods). Polyglutamine-encoding DNA constructs were synthesized using three pairs of complementary oligonucleotides. The “terminator” pair (AGTACTGATCAGCATGTCTGGCC and CTGGCCAGACATGCTGACTAGTA) encoded start of translation and contained cloning sites *Sau3AI* and *ScaI*. “Elongator” pairs (AGCAACAACAGCAAC and CTGTTGCTGTTGTTG; AGCAACAATATCAAC and CTGTTGATATTGTTG) encoded 5 glutamines (QQQQQ) or QQQYQ sequence. Every pair formed a duplex with protruding complementary 5'-AG and 5'-CT ends. Each elongator pair was mixed with terminator pair in a 10:1 proportion. The mix was treated with kinase, and then ligated, resulting in long poly-oligomers with random distance between terminator fragments. Ligated DNA was cut with *Sau3AI* and *ScaI*, size fractionated on agarose gel and ligated to *BamHI* and *Ecl136II* sites of pSBSE plasmid. This would create a fusion of synthetic polyglutamine-encoding fragment to Sup35MC domains encoded by the plasmid. Ligation mix was used to transform *E. coli*. Clones of transformants were tested by PCR for the length of polyglutamine-encoding insert. Selected clones were verified by sequencing of the inserts. In this way, we obtained series of multicopy yeast plasmids pnQ/QY-Sup35MC expressing fusion proteins with a sequence: MSG-(QQQ[Q/Y]Q)m-QSQGA-(Sup35MC). Surprisingly, some plasmids encoded proteins MSG-(QQQ[Q/Y]Q)m-PQGA-(Sup35MC) with P instead of QS. These constructs were also used for studies, since the difference does not appear significant.

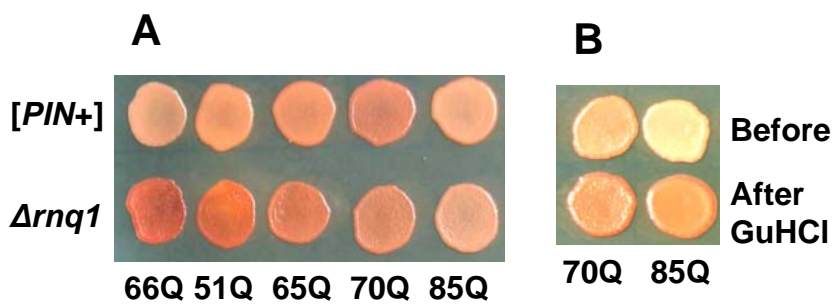

**Supplementary Figure 2. Changes of cell phenotypes related to altered polymerization of polyQ hybrid proteins.** Cells were grown on YPD-red medium. (A) In  $[PIN+]$  cells producing indicated polyQ proteins,  $[PIN+]$  was eliminated by disruption of the *RNQ1* gene ( $\Delta$ ). (B) In the  $\Delta rnq1$  cells containing polymers of the 70Q and 85Q proteins, the polymers were eliminated by growing single cells into colonies in the presence of 3mM GuHCl.
